# Supplementary material for: Calcium-Dependent Interaction of Nitric Oxide Synthase with Cytochrome c Oxidase: Implications for Brain Bioenergetics
Source: Brain Sci. 2023 Oct 31;13(11):1534. doi: 10.3390/brainsci13111534 (PMC10669843; doi:10.3390/brainsci13111534)
Supplement: Supplementary file 1 [file brainsci-13-01534-s001.zip]

Archive with 4 entries (4 files):
- Supplementary-File-1.xlsx
- __MACOSX/._Supplementary-File-1.xlsx
- Supplementary_Figures.pdf
- __MACOSX/._Supplementary_Figures.pdf
