# Supplementary material for: Calcium-Dependent Interaction of Nitric Oxide Synthase with Cytochrome c Oxidase: Implications for Brain Bioenergetics
Source: Brain Sci. 2023 Oct 31;13(11):1534. doi: 10.3390/brainsci13111534 (PMC10669843; doi:10.3390/brainsci13111534)
Supplement: Supplementary file 1 [file brainsci-13-01534-s001.zip › Supplementary-File-1.xlsx]

## Sheet: BIOGRID
Resuls from BioGrid on the interactors of mouse CcoVa
#BioGRID Interaction ID	Entrez Gene Interactor A	Entrez Gene Interactor B	BioGRID ID Interactor A	BioGRID ID Interactor B	Systematic Name Interactor A	Systematic Name Interactor B	Official Symbol Interactor A	Official Symbol Interactor B	Synonyms Interactor A	Synonyms Interactor B	Experimental System	Experimental System Type	Author	Publication Source	Organism ID Interactor A	Organism ID Interactor B	Throughput	Score	Modification	Qualifications	Tags	Source Database	SWISS-PROT Accessions Interactor A	TREMBL Accessions Interactor A	REFSEQ Accessions Interactor A	SWISS-PROT Accessions Interactor B	TREMBL Accessions Interactor B	REFSEQ Accessions Interactor B	Ontology Term IDs	Ontology Term Names	Ontology Term Categories	Ontology Term Qualifier IDs	Ontology Term Qualifier Names	Ontology Term Types	Organism Name Interactor A	Organism Name Interactor B
448899	6622	12858	112506	198841	-	-	SNCA	Cox5a	NACP|PARK1|PARK4|PD1	AA959768|CcOX	Affinity Capture-MS	physical	McFarland MA (2008)	PUBMED:18614564	9606	10090	Low Throughput	-	-	Baits with with preferential affinity for the non-phosphorylated alpha-synuclein	-	BIOGRID	P37840	H6UYS5	NP_000336|NP_009292|NP_001362216|NP_001362217|NP_001362214|NP_001362215|NP_001139526|NP_001139527	P12787	-	NP_031773	-	-	-	-	-	-	Homo sapiens	Mus musculus
740430	15194	12858	200268	198841	-	-	Htt	Cox5a	AI256365|C430023I11Rik|Hd|Hdh|IT15	AA959768|CcOX	Affinity Capture-MS	physical	Kaltenbach LS (2007)	PUBMED:17500595	10090	10090	High Throughput	-	-	-	-	BIOGRID	-	G3X9H5	NP_034544	P12787	-	NP_031773	-	-	-	-	-	-	Mus musculus	Mus musculus
831699	16348	12858	200780	198841	RP24-558L14.1	-	Invs	Cox5a	Nphp2|inv	AA959768|CcOX	Affinity Capture-MS	physical	Sang L (2011)	PUBMED:21565611	10090	10090	High Throughput	-	-	-	-	BIOGRID	-	A2AM57|A0JNT0|Q3TYB3	NP_001268907|NP_001268906|NP_034699	P12787	-	NP_031773	-	-	-	-	-	-	Mus musculus	Mus musculus
1256742	217331	12858	229889	198841	RP23-42F6.4	-	Unk	Cox5a	B230379M23Rik|Zc3h5|Zc3hdc5|mKIAA1753	AA959768|CcOX	Affinity Capture-RNA	physical	Murn J (2015)	PUBMED:25737280	10090	10090	High Throughput	-	-	-	-	BIOGRID	Q8BL48	Q3UYU7	NP_001272935|NP_766157	P12787	-	NP_031773	-	-	-	-	-	-	Mus musculus	Mus musculus
1521046	3028	12858	109278	198841	RP3-339A18.2	-	HSD17B10	Cox5a	17b-HSD10|ABAD|CAMR|DUPXp11.22|ERAB|HADH2|HCD2|MHBD|MRPP2|MRX17|MRX31|MRXS10|SCHAD|SDR5C1	AA959768|CcOX	Affinity Capture-MS	physical	Narayan SB (2012)	PUBMED:22496890	9606	10090	Low Throughput	-	-	-	-	BIOGRID	Q99714	-	NP_004484|NP_001032900	P12787	-	NP_031773	-	-	-	-	-	-	Homo sapiens	Mus musculus
2534395	217124	12858	229847	198841	RP23-112C19.3	-	Ppp1r9b	Cox5a	SPL|Spn	AA959768|CcOX	Affinity Capture-MS	physical	Watkins DS (2018)	PUBMED:30562941	10090	10090	High Throughput	-	-	-	-	BIOGRID	Q6R891	-	NP_758465	P12787	-	NP_031773	-	-	-	-	-	-	Mus musculus	Mus musculus
2662584	12858	110323	198841	225497	-	-	Cox5a	Cox6b1	AA959768|CcOX	2010000G05Rik|Cox6b	Co-fractionation	physical	Pourhaghighi R (2020)	PUBMED:32325033	10090	10090	High Throughput	0.758	-	High confidence interactions had an EPIC Score >= 0.683	-	BIOGRID	P12787	-	NP_031773	P56391	-	NP_079904	-	-	-	-	-	-	Mus musculus	Mus musculus
2662588	12858	12866	198841	198847	-	-	Cox5a	Cox7a2	AA959768|CcOX	COX7AL|Cox7a3|CoxVIIa-L	Co-fractionation	physical	Pourhaghighi R (2020)	PUBMED:32325033	10090	10090	High Throughput	0.794	-	High confidence interactions had an EPIC Score >= 0.683	-	BIOGRID	P12787	-	NP_031773	P48771	-	NP_034075	-	-	-	-	-	-	Mus musculus	Mus musculus
2662589	12858	12867	198841	198848	-	-	Cox5a	Cox7c	AA959768|CcOX	COXVIIc|Cox7c1	Co-fractionation	physical	Pourhaghighi R (2020)	PUBMED:32325033	10090	10090	High Throughput	0.835	-	High confidence interactions had an EPIC Score >= 0.683	-	BIOGRID	P12787	-	NP_031773	P17665	-	NP_031775	-	-	-	-	-	-	Mus musculus	Mus musculus
2662726	12858	13063	198841	198992	-	-	Cox5a	Cycs	AA959768|CcOX	-	Co-fractionation	physical	Pourhaghighi R (2020)	PUBMED:32325033	10090	10090	High Throughput	0.75	-	High confidence interactions had an EPIC Score >= 0.683	-	BIOGRID	P12787	-	NP_031773	P62897	Q56A15	NP_031834	-	-	-	-	-	-	Mus musculus	Mus musculus
2664135	12858	68342	198841	212811	-	-	Cox5a	Ndufb10	AA959768|CcOX	0610011B04Rik|22kDa|PDSW	Co-fractionation	physical	Pourhaghighi R (2020)	PUBMED:32325033	10090	10090	High Throughput	0.739	-	High confidence interactions had an EPIC Score >= 0.683	-	BIOGRID	P12787	-	NP_031773	Q9DCS9	-	NP_080960	-	-	-	-	-	-	Mus musculus	Mus musculus
2665564	12858	11739	198841	198105	-	-	Cox5a	Slc25a4	AA959768|CcOX	AU019225|Ant1	Co-fractionation	physical	Pourhaghighi R (2020)	PUBMED:32325033	10090	10090	High Throughput	0.743	-	High confidence interactions had an EPIC Score >= 0.683	-	BIOGRID	P12787	-	NP_031773	P48962	-	NP_031476	-	-	-	-	-	-	Mus musculus	Mus musculus
2665565	12858	11740	198841	198106	-	RP23-286I5.1	Cox5a	Slc25a5	AA959768|CcOX	Ant2	Co-fractionation	physical	Pourhaghighi R (2020)	PUBMED:32325033	10090	10090	High Throughput	0.704	-	High confidence interactions had an EPIC Score >= 0.683	-	BIOGRID	P12787	-	NP_031773	P51881	Q545A2	NP_031477	-	-	-	-	-	-	Mus musculus	Mus musculus
2667072	12858	11946	198841	198253	-	-	Cox5a	Atp5a1	AA959768|CcOX	AI035633|AL022851|AL023067|Atpm|D18Ertd206e|Mom2	Co-fractionation	physical	Pourhaghighi R (2020)	PUBMED:32325033	10090	10090	High Throughput	0.763	-	High confidence interactions had an EPIC Score >= 0.683	-	BIOGRID	P12787	-	NP_031773	Q03265	-	NP_031531	-	-	-	-	-	-	Mus musculus	Mus musculus
2667086	12858	11947	198841	198254	-	-	Cox5a	Atp5b	AA959768|CcOX	-	Co-fractionation	physical	Pourhaghighi R (2020)	PUBMED:32325033	10090	10090	High Throughput	0.7175	-	High confidence interactions had an EPIC Score >= 0.683	-	BIOGRID	P12787	-	NP_031773	P56480	-	NP_058054	-	-	-	-	-	-	Mus musculus	Mus musculus
2667127	12858	66043	198841	211172	-	-	Cox5a	Atp5d	AA959768|CcOX	0610008F14Rik|1500000I11Rik|AA960090|AI876556|AU020773|C85518	Co-fractionation	physical	Pourhaghighi R (2020)	PUBMED:32325033	10090	10090	High Throughput	0.7645	-	High confidence interactions had an EPIC Score >= 0.683	-	BIOGRID	P12787	-	NP_031773	Q9D3D9	D3Z7S4|Q4FK74	NP_079589	-	-	-	-	-	-	Mus musculus	Mus musculus
2667973	12858	12857	198841	198840	-	-	Cox5a	Cox4i1	AA959768|CcOX	AL024441|COX|COX IV-1|COXIV|Cox4|Cox4a|IV-1	Co-fractionation	physical	Pourhaghighi R (2020)	PUBMED:32325033	10090	10090	High Throughput	0.924	-	High confidence interactions had an EPIC Score >= 0.683	-	BIOGRID	P12787	-	NP_031773	P19783	A2RSV8	NP_001280488|NP_034071	-	-	-	-	-	-	Mus musculus	Mus musculus
2667976	17448	12858	201467	198841	-	-	Mdh2	Cox5a	MDH|Mdh-2|Mor-1|Mor1	AA959768|CcOX	Co-fractionation	physical	Pourhaghighi R (2020)	PUBMED:32325033	10090	10090	High Throughput	0.7535	-	High confidence interactions had an EPIC Score >= 0.683	-	BIOGRID	P08249	-	NP_032643	P12787	-	NP_031773	-	-	-	-	-	-	Mus musculus	Mus musculus
2667977	56012	12858	207767	198841	RP23-385C16.3	-	Pgam2	Cox5a	-	AA959768|CcOX	Co-fractionation	physical	Pourhaghighi R (2020)	PUBMED:32325033	10090	10090	High Throughput	0.7395	-	High confidence interactions had an EPIC Score >= 0.683	-	BIOGRID	O70250	Q5NCI4	NP_061358	P12787	-	NP_031773	-	-	-	-	-	-	Mus musculus	Mus musculus
2667978	20656	12858	203388	198841	-	-	Sod2	Cox5a	MnSOD|Sod-2	AA959768|CcOX	Co-fractionation	physical	Pourhaghighi R (2020)	PUBMED:32325033	10090	10090	High Throughput	0.726	-	High confidence interactions had an EPIC Score >= 0.683	-	BIOGRID	P09671	Q4FJX9	NP_038699	P12787	-	NP_031773	-	-	-	-	-	-	Mus musculus	Mus musculus
2667988	12858	12864	198841	198845	-	-	Cox5a	Cox6c	AA959768|CcOX	-	Co-fractionation	physical	Pourhaghighi R (2020)	PUBMED:32325033	10090	10090	High Throughput	0.894	-	High confidence interactions had an EPIC Score >= 0.683	-	BIOGRID	P12787	-	NP_031773	Q9CPQ1	-	NP_444301	-	-	-	-	-	-	Mus musculus	Mus musculus
2668297	12858	66445	198841	211479	-	-	Cox5a	Cyc1	AA959768|CcOX	2610002H19Rik|AA408921	Co-fractionation	physical	Pourhaghighi R (2020)	PUBMED:32325033	10090	10090	High Throughput	0.746	-	High confidence interactions had an EPIC Score >= 0.683	-	BIOGRID	P12787	-	NP_031773	Q9D0M3	-	NP_079843	-	-	-	-	-	-	Mus musculus	Mus musculus
2668606	12858	78920	198841	219707	-	-	Cox5a	Dlst	AA959768|CcOX	1600017E01Rik|4632413C10Rik|4930529O08Rik|DLTS	Co-fractionation	physical	Pourhaghighi R (2020)	PUBMED:32325033	10090	10090	High Throughput	0.745	-	High confidence interactions had an EPIC Score >= 0.683	-	BIOGRID	P12787	-	NP_031773	Q9D2G2	-	NP_084501	-	-	-	-	-	-	Mus musculus	Mus musculus
2671229	12858	17992	198841	201717	-	-	Cox5a	Ndufa4	AA959768|CcOX	MLRQ	Co-fractionation	physical	Pourhaghighi R (2020)	PUBMED:32325033	10090	10090	High Throughput	0.8575	-	High confidence interactions had an EPIC Score >= 0.683	-	BIOGRID	P12787	-	NP_031773	Q62425	-	NP_035016	-	-	-	-	-	-	Mus musculus	Mus musculus
2671694	12858	72900	198841	215635	-	-	Cox5a	Ndufv2	AA959768|CcOX	2900010C23Rik	Co-fractionation	physical	Pourhaghighi R (2020)	PUBMED:32325033	10090	10090	High Throughput	0.7665	-	High confidence interactions had an EPIC Score >= 0.683	-	BIOGRID	P12787	-	NP_031773	Q9D6J6	-	NP_001265344|NP_082664	-	-	-	-	-	-	Mus musculus	Mus musculus
2675193	12858	52892	198841	206870	-	RP23-67J22.1	Cox5a	Sco1	AA959768|CcOX	2610001C07Rik|D11Bwg1310e	Co-fractionation	physical	Pourhaghighi R (2020)	PUBMED:32325033	10090	10090	High Throughput	0.785	-	High confidence interactions had an EPIC Score >= 0.683	-	BIOGRID	P12787	-	NP_031773	Q5SUC9	-	NP_001035115	-	-	-	-	-	-	Mus musculus	Mus musculus
2675219	12858	66945	198841	211828	-	-	Cox5a	Sdha	AA959768|CcOX	1500032O14Rik|2310034D06Rik|4921513A11|C81073|FP|SDH2|SDHF	Co-fractionation	physical	Pourhaghighi R (2020)	PUBMED:32325033	10090	10090	High Throughput	0.708	-	High confidence interactions had an EPIC Score >= 0.683	-	BIOGRID	P12787	-	NP_031773	Q8K2B3	-	NP_075770	-	-	-	-	-	-	Mus musculus	Mus musculus
2676219	12858	21991	198841	204290	-	-	Cox5a	Tpi1	AA959768|CcOX	AI255506|Tpi|Tpi-1	Co-fractionation	physical	Pourhaghighi R (2020)	PUBMED:32325033	10090	10090	High Throughput	0.716	-	High confidence interactions had an EPIC Score >= 0.683	-	BIOGRID	P12787	-	NP_031773	P17751	-	NP_033441	-	-	-	-	-	-	Mus musculus	Mus musculus
2676762	12858	67003	198841	211868	-	-	Cox5a	Uqcrc2	AA959768|CcOX	1500004O06Rik	Co-fractionation	physical	Pourhaghighi R (2020)	PUBMED:32325033	10090	10090	High Throughput	0.732	-	High confidence interactions had an EPIC Score >= 0.683	-	BIOGRID	P12787	-	NP_031773	Q9DB77	-	NP_080175	-	-	-	-	-	-	Mus musculus	Mus musculus
2676804	12858	66694	198841	211651	-	-	Cox5a	Uqcrfs1	AA959768|CcOX	4430402G14Rik|AI875505	Co-fractionation	physical	Pourhaghighi R (2020)	PUBMED:32325033	10090	10090	High Throughput	0.8755	-	High confidence interactions had an EPIC Score >= 0.683	-	BIOGRID	P12787	-	NP_031773	Q9CR68	-	NP_079986	-	-	-	-	-	-	Mus musculus	Mus musculus
2678134	12858	11949	198841	198255	-	RP23-119N4.1	Cox5a	Atp5c1	AA959768|CcOX	1700094F02Rik	Co-fractionation	physical	Pourhaghighi R (2020)	PUBMED:32325033	10090	10090	High Throughput	0.788	-	High confidence interactions had an EPIC Score >= 0.683	-	BIOGRID	P12787	-	NP_031773	Q91VR2	Q3UD06|A2AKU9|Q8C2Q8	NP_065640|NP_001106209	-	-	-	-	-	-	Mus musculus	Mus musculus
2678144	12858	67126	198841	211960	-	RP23-59M10.5	Cox5a	Atp5e	AA959768|CcOX	2410043G19Rik|ATPE|AV000645	Co-fractionation	physical	Pourhaghighi R (2020)	PUBMED:32325033	10090	10090	High Throughput	0.771	-	High confidence interactions had an EPIC Score >= 0.683	-	BIOGRID	P12787	-	NP_031773	P56382	Q545F5	NP_080259	-	-	-	-	-	-	Mus musculus	Mus musculus
2678154	12858	11958	198841	198259	-	-	Cox5a	Atp5k	AA959768|CcOX	2610008D24Rik|Atp5i|Lfm1	Co-fractionation	physical	Pourhaghighi R (2020)	PUBMED:32325033	10090	10090	High Throughput	0.761	-	High confidence interactions had an EPIC Score >= 0.683	-	BIOGRID	P12787	-	NP_031773	Q06185	-	NP_031533	-	-	-	-	-	-	Mus musculus	Mus musculus
2678158	12858	27425	198841	205227	-	-	Cox5a	Atp5l	AA959768|CcOX	4933437C06Rik	Co-fractionation	physical	Pourhaghighi R (2020)	PUBMED:32325033	10090	10090	High Throughput	0.742	-	High confidence interactions had an EPIC Score >= 0.683	-	BIOGRID	P12787	-	NP_031773	Q9CPQ8	-	NP_038823	-	-	-	-	-	-	Mus musculus	Mus musculus
2679718	12858	235339	198841	231646	-	-	Cox5a	Dlat	AA959768|CcOX	6332404G05Rik|DLTA|PDC-E2	Co-fractionation	physical	Pourhaghighi R (2020)	PUBMED:32325033	10090	10090	High Throughput	0.701	-	High confidence interactions had an EPIC Score >= 0.683	-	BIOGRID	P12787	-	NP_031773	Q8BMF4	-	NP_663589	-	-	-	-	-	-	Mus musculus	Mus musculus
2682855	12858	67273	198841	212064	-	-	Cox5a	Ndufa10	AA959768|CcOX	2900053E13Rik	Co-fractionation	physical	Pourhaghighi R (2020)	PUBMED:32325033	10090	10090	High Throughput	0.69	-	High confidence interactions had an EPIC Score >= 0.683	-	BIOGRID	P12787	-	NP_031773	Q99LC3	-	NP_077159	-	-	-	-	-	-	Mus musculus	Mus musculus
2682859	12858	66414	198841	211458	-	-	Cox5a	Ndufa12	AA959768|CcOX	2410011G03Rik|AW112974	Co-fractionation	physical	Pourhaghighi R (2020)	PUBMED:32325033	10090	10090	High Throughput	0.716	-	High confidence interactions had an EPIC Score >= 0.683	-	BIOGRID	P12787	-	NP_031773	Q7TMF3	-	NP_079827	-	-	-	-	-	-	Mus musculus	Mus musculus
2682949	12858	227197	198841	230599	-	-	Cox5a	Ndufs1	AA959768|CcOX	5830412M15Rik|9930026A05Rik	Co-fractionation	physical	Pourhaghighi R (2020)	PUBMED:32325033	10090	10090	High Throughput	0.79	-	High confidence interactions had an EPIC Score >= 0.683	-	BIOGRID	P12787	-	NP_031773	Q91VD9	-	NP_001153512|NP_001153511|NP_001153510|NP_663493	-	-	-	-	-	-	Mus musculus	Mus musculus
2682955	12858	226646	198841	230541	-	-	Cox5a	Ndufs2	AA959768|CcOX	AL033311	Co-fractionation	physical	Pourhaghighi R (2020)	PUBMED:32325033	10090	10090	High Throughput	0.71	-	High confidence interactions had an EPIC Score >= 0.683	-	BIOGRID	P12787	-	NP_031773	Q91WD5	-	NP_694704	-	-	-	-	-	-	Mus musculus	Mus musculus
2682959	12858	68349	198841	212816	-	RP23-147D3.3	Cox5a	Ndufs3	AA959768|CcOX	0610010M09Rik|CI-30kD	Co-fractionation	physical	Pourhaghighi R (2020)	PUBMED:32325033	10090	10090	High Throughput	0.767	-	High confidence interactions had an EPIC Score >= 0.683	-	BIOGRID	P12787	-	NP_031773	Q9DCT2	-	NP_080964	-	-	-	-	-	-	Mus musculus	Mus musculus
2685976	12858	67680	198841	212362	-	RP23-183L1.3	Cox5a	Sdhb	AA959768|CcOX	0710008N11Rik	Co-fractionation	physical	Pourhaghighi R (2020)	PUBMED:32325033	10090	10090	High Throughput	0.724	-	High confidence interactions had an EPIC Score >= 0.683	-	BIOGRID	P12787	-	NP_031773	Q9CQA3	-	NP_075863	-	-	-	-	-	-	Mus musculus	Mus musculus
2687937	12858	66477	198841	211501	-	-	Cox5a	Usmg5	AA959768|CcOX	2010301L15Rik	Co-fractionation	physical	Pourhaghighi R (2020)	PUBMED:32325033	10090	10090	High Throughput	0.684	-	High confidence interactions had an EPIC Score >= 0.683	-	BIOGRID	P12787	-	NP_031773	Q78IK2	-	NP_075700	-	-	-	-	-	-	Mus musculus	Mus musculus
2902782	11537	12858	197991	198841	-	-	Cfd	Cox5a	Adn|DF	AA959768|CcOX	Affinity Capture-MS	physical	Kim H (2018)	PUBMED:30550785	10090	10090	High Throughput	-	-	-	-	BIOGRID	P03953	B7ZNS9|Q3UP47	NP_038487|NP_001278844	P12787	-	NP_031773	-	-	-	-	-	-	Mus musculus	Mus musculus
2903281	384061	12858	239035	198841	RP23-284L6.4	-	Fndc5	Cox5a	1500001L03Rik|AI836596|C87088|PeP|Pxp	AA959768|CcOX	Affinity Capture-MS	physical	Kim H (2018)	PUBMED:30550785	10090	10090	High Throughput	-	-	-	-	BIOGRID	Q8K4Z2	-	NP_081678	P12787	-	NP_031773	-	-	-	-	-	-	Mus musculus	Mus musculus
3526165	69017	12858	213173	198841	-	-	Prrt2	Cox5a	1500031I19Rik|AI195361|DSPB3	AA959768|CcOX	Affinity Capture-MS	physical	Forrest MP (2023)	PUBMED:36808153	10090	10090	High Throughput	-	-	High confidence interactions included proteins that bound to anti-PRRT2 antibodies with a cut off of P<0.1 compared to an IgG control.	-	BIOGRID	E9PUL5	-	NP_001096033	P12787	-	NP_031773	-	-	-	-	-	-	Mus musculus	Mus musculus

## Sheet: IntAct
Results from IntAct on the interactors of mouse CcoVa
# ID(s) interactor A	ID(s) interactor B	Alt. ID(s) interactor A	Alt. ID(s) interactor B	Alias(es) interactor A	Alias(es) interactor B	Interaction detection method(s)	Publication 1st author(s)	Publication Identifier(s)	Taxid interactor A	Taxid interactor B	Interaction type(s)	Source database(s)	Interaction identifier(s)	Confidence value(s)	Expansion method(s)	Biological role(s) interactor A	Biological role(s) interactor B	Experimental role(s) interactor A	Experimental role(s) interactor B	Type(s) interactor A	Type(s) interactor B	Xref(s) interactor A	Xref(s) interactor B	Interaction Xref(s)	Annotation(s) interactor A	Annotation(s) interactor B	Interaction annotation(s)	Host organism(s)	Interaction parameter(s)	Creation date	Update date	Checksum(s) interactor A	Checksum(s) interactor B	Interaction Checksum(s)	Negative	Feature(s) interactor A	Feature(s) interactor B	Stoichiometry(s) interactor A	Stoichiometry(s) interactor B	Identification method participant A	Identification method participant B
uniprotkb:P68510	uniprotkb:P12787	uniprotkb:P11576|uniprotkb:P70198|uniprotkb:Q3TGZ9|ensembl:ENSMUSP00000019109.8|intact:EBI-444641|uniprotkb:P68510	uniprotkb:Q9D2W1|ensembl:ENSMUSP00000000090.7|intact:EBI-2934751|uniprotkb:P12787	psi-mi:1433f_mouse(display_short)|psi-mi:14-3-3 protein eta(display_long)|uniprotkb:YWHAH(gene name)	psi-mi:cox5a_mouse(display_short)|psi-mi:Cytochrome c oxidase subunit 5A, mitochondrial(display_long)|uniprotkb:Cytochrome c oxidase polypeptide Va(gene name synonym)|uniprotkb:COX5A(gene name)	psi-mi:"MI:0030"(cross-linking study)	Schiller HB. et al.(2011)	intact:EBI-8585471|doi:10.1038/embor.2011.5|mint:MINT-8151742|pubmed:21311561|mint:MINT-8151724|imex:IM-15414	taxid:10090(mouse)|taxid:10090(Mus musculus)	taxid:10090(mouse)|taxid:10090(Mus musculus)	psi-mi:"MI:0914"(association)	psi-mi:"MI:0471"(MINT, Dpt of Biology, University of Rome Tor Vergata)	intact:EBI-8586548|mint:MINT-8178518|imex:IM-15414-1	-	psi-mi:"MI:1060"(spoke expansion)	psi-mi:"MI:0499"(unspecified role)	psi-mi:"MI:0499"(unspecified role)	psi-mi:"MI:0499"(unspecified role)	psi-mi:"MI:0499"(unspecified role)	psi-mi:"MI:0326"(protein)	psi-mi:"MI:0326"(protein)	reactome:R-MMU-75035|reactome:R-MMU-5628897|interpro:IPR000308|interpro:IPR023409|interpro:IPR023410|interpro:IPR036815|rcsb pdb:5YQG|go:"GO:0002028"|go:"GO:0003779"|go:"GO:0005737"|go:"GO:0005829"|go:"GO:0005886"|go:"GO:0006713"|go:"GO:0006886"|go:"GO:0007010"|go:"GO:0007088"|go:"GO:0007165"|go:"GO:0014704"|go:"GO:0017080"|go:"GO:0019899"|go:"GO:0019904"|go:"GO:0035259"|go:"GO:0042802"|go:"GO:00…	interpro:IPR003204|interpro:IPR036545|rcsb pdb:7O37|rcsb pdb:7O3C|rcsb pdb:7O3E|go:"GO:0004129"|go:"GO:0005739"|go:"GO:0005743"|go:"GO:0005751"|go:"GO:0006123"|go:"GO:0043209"|go:"GO:0046872"|ensembl:ENSMUSG00000000088.8(gene)|ensembl:ENSMUST00000000090.8(transcript)|mint:P12787|refseq:NP_031773.2|reactome:R-MMU-5628897|reactome:R-MMU-611105|reactome:R-MMU-9707564|uniprotkb:P12787(original identi…		-	-	figure legend:F1D ST1|comment:mint|comment:domino|comment:homomint|full coverage:Only protein-protein interactions	taxid:10090(mouse-fibroblast)|taxid:10090(Mus musculus)	-	2013-08-22	2020-10-21	crc64:C12F62B4ABA76DA3	crc64:8F6AFF91B5C6160F	-	-	-	-	0	0	psi-mi:"MI:0427"(Identification by mass spectrometry)|psi-mi:"MI:0396"(predetermined participant)	psi-mi:"MI:0396"(predetermined participant)|psi-mi:"MI:0427"(Identification by mass spectrometry)
uniprotkb:P51637	uniprotkb:P12787	ensembl:ENSMUSP00000074922.7|intact:EBI-298576|uniprotkb:P51637	uniprotkb:Q9D2W1|ensembl:ENSMUSP00000000090.7|intact:EBI-2934751|uniprotkb:P12787	psi-mi:cav3_mouse(display_short)|psi-mi:Caveolin-3(display_long)|uniprotkb:Cav3(gene name)|uniprotkb:M-caveolin(gene name synonym)	psi-mi:cox5a_mouse(display_short)|psi-mi:Cytochrome c oxidase subunit 5A, mitochondrial(display_long)|uniprotkb:Cytochrome c oxidase polypeptide Va(gene name synonym)|uniprotkb:COX5A(gene name)	psi-mi:"MI:0006"(anti bait coimmunoprecipitation)	Lundby A. et al.(2014)	intact:EBI-20564517|pubmed:24952909|imex:IM-26422	taxid:10090(mouse)|taxid:10090(Mus musculus)	taxid:10090(mouse)|taxid:10090(Mus musculus)	psi-mi:"MI:0914"(association)	psi-mi:"MI:0469"(European Bioinformatics Institute)	intact:EBI-20565496|imex:IM-26422-7	-	psi-mi:"MI:1060"(spoke expansion)	psi-mi:"MI:0499"(unspecified role)	psi-mi:"MI:0499"(unspecified role)	psi-mi:"MI:0496"(bait)	psi-mi:"MI:0498"(prey)	psi-mi:"MI:0326"(protein)	psi-mi:"MI:0326"(protein)	refseq:NP_031643.1|dip:DIP-31069N|mint:P51637|ensembl:ENSMUST00000075477.8(transcript)|ensembl:ENSMUSG00000062694.8(gene)|go:"GO:0051896"|go:"GO:0051649"|go:"GO:0051647"|go:"GO:0051480"|go:"GO:0051394"|go:"GO:0051001"|go:"GO:0050998"|go:"GO:0045792"|go:"GO:0045121"|go:"GO:0044877"|go:"GO:0044325"|go:"GO:0043409"|go:"GO:0043407"|go:"GO:0043231"|go:"GO:0043014"|go:"GO:0014704"|go:"GO:0010831"|go:"G…	interpro:IPR003204|interpro:IPR036545|rcsb pdb:7O37|rcsb pdb:7O3C|rcsb pdb:7O3E|go:"GO:0004129"|go:"GO:0005739"|go:"GO:0005743"|go:"GO:0005751"|go:"GO:0006123"|go:"GO:0043209"|go:"GO:0046872"|ensembl:ENSMUSG00000000088.8(gene)|ensembl:ENSMUST00000000090.8(transcript)|mint:P12787|refseq:NP_031773.2|reactome:R-MMU-5628897|reactome:R-MMU-611105|reactome:R-MMU-9707564		-	-	figure legend:Table S6, Fig. S4|full coverage:Only protein-protein interactions	taxid:10090(mouse-heart)|taxid:10090(Mus musculus heart [Cardiac; Cardiac tissue])	-	2018-05-27	2023-05-11	crc64:7C1A181010CC60F1	crc64:8F6AFF91B5C6160F	-	-	-	-	0	0	psi-mi:"MI:0102"(sequence tag identification)	psi-mi:"MI:0102"(sequence tag identification)
uniprotkb:A2AM57	uniprotkb:P12787	ensembl:ENSMUSP00000030029.4|intact:EBI-4280712|uniprotkb:A2AM57	uniprotkb:Q9D2W1|ensembl:ENSMUSP00000000090.7|intact:EBI-2934751|uniprotkb:P12787	psi-mi:a2am57_mouse(display_short)|uniprotkb:INVS(gene name)	psi-mi:cox5a_mouse(display_short)|psi-mi:Cytochrome c oxidase subunit 5A, mitochondrial(display_long)|uniprotkb:Cytochrome c oxidase polypeptide Va(gene name synonym)|uniprotkb:COX5A(gene name)	psi-mi:"MI:0007"(anti tag coimmunoprecipitation)	Sang L. et al.(2011)	intact:EBI-4280520|pubmed:21565611|imex:IM-16529	taxid:10090(mouse)|taxid:10090(Mus musculus)	taxid:10090(mouse)|taxid:10090(Mus musculus)	psi-mi:"MI:0914"(association)	psi-mi:"MI:0469"(European Bioinformatics Institute)	intact:EBI-4282630|imex:IM-16529-4	-	psi-mi:"MI:1060"(spoke expansion)	psi-mi:"MI:0499"(unspecified role)	psi-mi:"MI:0499"(unspecified role)	psi-mi:"MI:0496"(bait)	psi-mi:"MI:0498"(prey)	psi-mi:"MI:0326"(protein)	psi-mi:"MI:0326"(protein)	interpro:IPR000048|interpro:IPR002110|interpro:IPR036770|go:"GO:0090090"|ensembl:ENSMUSG00000028344.13(gene)|ensembl:ENSMUST00000030029.10(transcript)|refseq:NP_034699.3	interpro:IPR003204|interpro:IPR036545|rcsb pdb:7O37|rcsb pdb:7O3C|rcsb pdb:7O3E|go:"GO:0004129"|go:"GO:0005739"|go:"GO:0005743"|go:"GO:0005751"|go:"GO:0006123"|go:"GO:0043209"|go:"GO:0046872"|ensembl:ENSMUSG00000000088.8(gene)|ensembl:ENSMUST00000000090.8(transcript)|mint:P12787|refseq:NP_031773.2|reactome:R-MMU-5628897|reactome:R-MMU-611105|reactome:R-MMU-9707564	psi-mi:"MI:0469"(imex source)	-	-	figure legend:Fig. 1, Supp. Fig. 1. Supp. Table 1|full coverage:Only protein-protein interactions	taxid:10090(mouse-imcd3)|taxid:10090("Mouse inner medullary collecting duct (mIMCD3) cells")	-	2011-06-17	2020-10-21	crc64:EC8C6CDAD236AFC3	crc64:8F6AFF91B5C6160F	-	-	tandem tag:n-n	-	0	0	psi-mi:"MI:0102"(sequence tag identification)	psi-mi:"MI:0102"(sequence tag identification)
uniprotkb:P42858	uniprotkb:P12787	uniprotkb:Q9UQB7|ensembl:ENSP00000347184.5|intact:EBI-466029|uniprotkb:P42858	uniprotkb:Q9D2W1|ensembl:ENSMUSP00000000090.7|intact:EBI-2934751|uniprotkb:P12787	psi-mi:hd_human(display_short)|psi-mi:Huntingtin(display_long)|uniprotkb:HTT(gene name)|uniprotkb:Huntington disease protein(gene name synonym)|uniprotkb:HD(gene name synonym)|uniprotkb:IT15(gene name synonym)	psi-mi:cox5a_mouse(display_short)|psi-mi:Cytochrome c oxidase subunit 5A, mitochondrial(display_long)|uniprotkb:Cytochrome c oxidase polypeptide Va(gene name synonym)|uniprotkb:COX5A(gene name)	psi-mi:"MI:0096"(pull down)	Kaltenbach L.S. et al.(2007)	intact:EBI-8875039|pubmed:17500595|imex:IM-21753	taxid:9606(human)|taxid:9606(Homo sapiens)	taxid:10090(mouse)|taxid:10090(Mus musculus)	psi-mi:"MI:0914"(association)	psi-mi:"MI:0469"(European Bioinformatics Institute)	intact:EBI-9072179|imex:IM-21753-275	-	psi-mi:"MI:1060"(spoke expansion)	psi-mi:"MI:0499"(unspecified role)	psi-mi:"MI:0499"(unspecified role)	psi-mi:"MI:0496"(bait)	psi-mi:"MI:0498"(prey)	psi-mi:"MI:0326"(protein)	psi-mi:"MI:0326"(protein)	reactome:R-HSA-9022692|refseq:NP_002102.4|dip:DIP-32492N|mint:P42858|ensembl:ENST00000355072.11(transcript)|ensembl:ENSG00000197386.14(gene)|go:"GO:2001237"|go:"GO:2000479"|go:"GO:1905337"|go:"GO:1905289"|go:"GO:1904504"|go:"GO:1903599"|go:"GO:0099524"|go:"GO:0099523"|go:"GO:0099111"|go:"GO:0048487"|go:"GO:0048471"|go:"GO:0047496"|go:"GO:0045724"|go:"GO:0045505"|go:"GO:0044325"|go:"GO:0043666"|go…	interpro:IPR003204|interpro:IPR036545|rcsb pdb:7O37|rcsb pdb:7O3C|rcsb pdb:7O3E|go:"GO:0004129"|go:"GO:0005739"|go:"GO:0005743"|go:"GO:0005751"|go:"GO:0006123"|go:"GO:0043209"|go:"GO:0046872"|ensembl:ENSMUSG00000000088.8(gene)|ensembl:ENSMUST00000000090.8(transcript)|mint:P12787|refseq:NP_031773.2|reactome:R-MMU-5628897|reactome:R-MMU-611105|reactome:R-MMU-9707564|genbank_protein_gi:6680986(ident…	psi-mi:"MI:0469"(source reference)	-	-	figure legend:Table 1, supplementary table 1|full coverage:Only protein-protein interactions	taxid:-1(in vitro)|taxid:-1(In vitro)	-	2013-12-18	2020-10-21	crc64:A267509E84D52F0D	crc64:8F6AFF91B5C6160F	-	-	tandem tag:n-n|mutation:18..18-38..38|sufficient binding region:1-90	-	0	0	psi-mi:"MI:0102"(sequence tag identification)	psi-mi:"MI:0102"(sequence tag identification)
uniprotkb:Q3U1F9	uniprotkb:P12787	intact:UNK-5409398|uniprotkb:Q8BFS1|uniprotkb:Q9EQF3|ensembl:ENSMUSP00000104021.3|ensembl:ENSMUSP00000124529.2|intact:EBI-8468834|uniprotkb:Q3U1F9	uniprotkb:Q9D2W1|ensembl:ENSMUSP00000000090.7|intact:EBI-2934751|uniprotkb:P12787	psi-mi:phag1_mouse(display_short)|psi-mi:Phosphoprotein associated with glycosphingolipid-enriched microdomains 1(display_long)|uniprotkb:CBP(gene name synonym)|uniprotkb:PAG(gene name synonym)|uniprotkb:Csk-binding protein(gene name synonym)|uniprotkb:Transmembrane phosphoprotein Cbp(gene name synonym)|uniprotkb:PAG1(gene name)	psi-mi:cox5a_mouse(display_short)|psi-mi:Cytochrome c oxidase subunit 5A, mitochondrial(display_long)|uniprotkb:Cytochrome c oxidase polypeptide Va(gene name synonym)|uniprotkb:COX5A(gene name)	psi-mi:"MI:0004"(affinity chromatography technology)	Reginald K et al.(2015)	intact:EBI-12561796|pubmed:26512138|imex:IM-25616	taxid:10090(mouse)|taxid:10090(Mus musculus)	taxid:10090(mouse)|taxid:10090(Mus musculus)	psi-mi:"MI:0914"(association)	psi-mi:"MI:0469"(European Bioinformatics Institute)	intact:EBI-12603102|imex:IM-25616-3	-	psi-mi:"MI:1060"(spoke expansion)	psi-mi:"MI:0499"(unspecified role)	psi-mi:"MI:0499"(unspecified role)	psi-mi:"MI:0496"(bait)	psi-mi:"MI:0498"(prey)	psi-mi:"MI:0326"(protein)	psi-mi:"MI:0326"(protein)	interpro:IPR032748|go:"GO:0002250"|go:"GO:0005886"|go:"GO:0035556"|go:"GO:0042169"|go:"GO:0045121"|go:"GO:0050863"|go:"GO:0050868"|ensembl:ENSMUSG00000027508.16(gene)|ensembl:ENSMUST00000108384.9(transcript)|ensembl:ENSMUST00000161949.8(transcript)|mint:Q3U1F9|refseq:XP_011246453.1|refseq:NP_001181960.1|refseq:NP_444412.2|refseq:XP_006530170.1|reactome:R-MMU-180292|reactome:R-MMU-202427	interpro:IPR003204|interpro:IPR036545|rcsb pdb:7O37|rcsb pdb:7O3C|rcsb pdb:7O3E|go:"GO:0004129"|go:"GO:0005739"|go:"GO:0005743"|go:"GO:0005751"|go:"GO:0006123"|go:"GO:0043209"|go:"GO:0046872"|ensembl:ENSMUSG00000000088.8(gene)|ensembl:ENSMUST00000000090.8(transcript)|mint:P12787|refseq:NP_031773.2|reactome:R-MMU-5628897|reactome:R-MMU-611105|reactome:R-MMU-9707564		function:"Negatively regulates TCR (T-cell antigen receptor)-mediated signaling in T-cells and FCER1 (high affinity immunoglobulin epsilon receptor)-mediated signaling in mast cells. Promotes CSK activation and recruitment to lipid rafts, which results in LCK inhibition. Inhibits immunological synapse formation by preventing dynamic arrangement of lipid raft proteins. May be involved in cell adhe…	-	figure legend:Fig. 4B, Supplementary Table 2|full coverage:Only protein-protein interactions	taxid:10090(mouse-t-cell_cd4+)|taxid:10090(Mouse CD4 positive T-cell)	-	2016-11-29	2016-11-29	crc64:F5A95257B4C4DADC	crc64:8F6AFF91B5C6160F	-	-	strep ii tag:c-c	-	0	0	psi-mi:"MI:0102"(sequence tag identification)	psi-mi:"MI:0102"(sequence tag identification)
uniprotkb:P37840	uniprotkb:P12787	uniprotkb:Q13701|uniprotkb:Q4JHI3|uniprotkb:Q6IAU6|uniprotkb:A8K2A4|ensembl:ENSP00000338345.3|ensembl:ENSP00000378437.1|ensembl:ENSP00000378442.4|ensembl:ENSP00000422238.1|ensembl:ENSP00000426955.1|ensembl:ENSP00000500990.1|intact:EBI-985879|uniprotkb:P37840	uniprotkb:Q9D2W1|ensembl:ENSMUSP00000000090.7|intact:EBI-2934751|uniprotkb:P12787	psi-mi:syua_human(display_short)|psi-mi:Alpha-synuclein(display_long)|uniprotkb:SNCA(gene name)|uniprotkb:PARK1(gene name synonym)|uniprotkb:NACP(gene name synonym)|uniprotkb:Non-A4 component of amyloid precursor(gene name synonym)|uniprotkb:Non-A beta component of AD amyloid(gene name synonym)	psi-mi:cox5a_mouse(display_short)|psi-mi:Cytochrome c oxidase subunit 5A, mitochondrial(display_long)|uniprotkb:Cytochrome c oxidase polypeptide Va(gene name synonym)|uniprotkb:COX5A(gene name)	psi-mi:"MI:0096"(pull down)	McFarland MA. et al.(2008)	intact:EBI-2935364|pubmed:18614564|imex:IM-19211	taxid:9606(human)|taxid:9606(Homo sapiens)	taxid:10090(mouse)|taxid:10090(Mus musculus)	psi-mi:"MI:0914"(association)	psi-mi:"MI:0469"(European Bioinformatics Institute)	intact:EBI-2934222|imex:IM-19211-3	-	psi-mi:"MI:1060"(spoke expansion)	psi-mi:"MI:0499"(unspecified role)	psi-mi:"MI:0499"(unspecified role)	psi-mi:"MI:0496"(bait)	psi-mi:"MI:0498"(prey)	psi-mi:"MI:0326"(protein)	psi-mi:"MI:0326"(protein)	reactome:R-HSA-977225|refseq:XP_016864052.1|refseq:XP_016864051.1|refseq:NP_009292.1|refseq:NP_001139527.1|refseq:NP_001139526.1|refseq:NP_000336.1|refseq:XP_011530510.1|dip:DIP-35354N|mint:P37840|ensembl:ENST00000673718.1(transcript)|ensembl:ENST00000508895.5(transcript)|ensembl:ENST00000506244.5(transcript)|ensembl:ENST00000394991.8(transcript)|ensembl:ENST00000394986.5(transcript)|ensembl:ENST…	interpro:IPR003204|interpro:IPR036545|rcsb pdb:7O37|rcsb pdb:7O3C|rcsb pdb:7O3E|go:"GO:0004129"|go:"GO:0005739"|go:"GO:0005743"|go:"GO:0005751"|go:"GO:0006123"|go:"GO:0043209"|go:"GO:0046872"|ensembl:ENSMUSG00000000088.8(gene)|ensembl:ENSMUST00000000090.8(transcript)|mint:P12787|refseq:NP_031773.2|reactome:R-MMU-5628897|reactome:R-MMU-611105|reactome:R-MMU-9707564		-	-	comment:Proteins showing preferential affinity for the non phosphorylated SNCA peptide.|figure legend:Fig 1, Table 4.|full coverage:Only protein-protein interactions	taxid:10090(mouse-brain)|taxid:10090(Mus musculus brain)	-	2010-10-12	2015-06-10	crc64:6BB2F12128931663	crc64:8F6AFF91B5C6160F	-	-	biotin tag:n-n|sufficient binding region:101-140	-	0	0	psi-mi:"MI:0102"(sequence tag identification)	psi-mi:"MI:0102"(sequence tag identification)
uniprotkb:Q01815	uniprotkb:P12787	uniprotkb:Q04476|uniprotkb:Q61242|uniprotkb:Q99242|ensembl:ENSMUSP00000075021.8|ensembl:ENSMUSP00000077433.9|intact:EBI-644904|uniprotkb:Q01815	uniprotkb:Q9D2W1|ensembl:ENSMUSP00000000090.7|intact:EBI-2934751|uniprotkb:P12787	psi-mi:cac1c_mouse(display_short)|psi-mi:Voltage-dependent L-type calcium channel subunit alpha-1C(display_long)|uniprotkb:CACNA1C(gene name)|uniprotkb:CCHL1A1(gene name synonym)|uniprotkb:CACNL1A1(gene name synonym)|uniprotkb:CACN2(gene name synonym)|uniprotkb:CACH2(gene name synonym)|uniprotkb:MELC-CC(gene name synonym)|uniprotkb:Mouse brain class C(gene name synonym)|uniprotkb:Calcium channel,…	psi-mi:cox5a_mouse(display_short)|psi-mi:Cytochrome c oxidase subunit 5A, mitochondrial(display_long)|uniprotkb:Cytochrome c oxidase polypeptide Va(gene name synonym)|uniprotkb:COX5A(gene name)	psi-mi:"MI:0006"(anti bait coimmunoprecipitation)	Lundby A. et al.(2014)	intact:EBI-20564517|pubmed:24952909|imex:IM-26422	taxid:10090(mouse)|taxid:10090(Mus musculus)	taxid:10090(mouse)|taxid:10090(Mus musculus)	psi-mi:"MI:0914"(association)	psi-mi:"MI:0469"(European Bioinformatics Institute)	intact:EBI-20565155|imex:IM-26422-5	-	psi-mi:"MI:1060"(spoke expansion)	psi-mi:"MI:0499"(unspecified role)	psi-mi:"MI:0499"(unspecified role)	psi-mi:"MI:0496"(bait)	psi-mi:"MI:0498"(prey)	psi-mi:"MI:0326"(protein)	psi-mi:"MI:0326"(protein)	reactome:R-MMU-5576893|reactome:R-MMU-5576892|reactome:R-MMU-422356|refseq:NP_001153005.1|dip:DIP-32232N|mint:Q01815|ensembl:ENSMUST00000078320.14(transcript)|ensembl:ENSMUST00000075591.13(transcript)|ensembl:ENSMUSG00000051331.17(gene)|go:"GO:0044325"|go:"GO:0043204"|go:"GO:0043198"|go:"GO:0043025"|go:"GO:0043010"|go:"GO:0042734"|go:"GO:0042593"|go:"GO:0042383"|go:"GO:0035115"|go:"GO:0032991"|go…	interpro:IPR003204|interpro:IPR036545|rcsb pdb:7O37|rcsb pdb:7O3C|rcsb pdb:7O3E|go:"GO:0004129"|go:"GO:0005739"|go:"GO:0005743"|go:"GO:0005751"|go:"GO:0006123"|go:"GO:0043209"|go:"GO:0046872"|ensembl:ENSMUSG00000000088.8(gene)|ensembl:ENSMUST00000000090.8(transcript)|mint:P12787|refseq:NP_031773.2|reactome:R-MMU-5628897|reactome:R-MMU-611105|reactome:R-MMU-9707564		-	-	figure legend:Table S5, Fig. S3|full coverage:Only protein-protein interactions	taxid:10090(mouse-heart)|taxid:10090(Mus musculus heart [Cardiac; Cardiac tissue])	-	2018-05-27	2018-06-04	crc64:B564C57A8644E165	crc64:8F6AFF91B5C6160F	-	-	-	-	0	0	psi-mi:"MI:0102"(sequence tag identification)	psi-mi:"MI:0102"(sequence tag identification)
uniprotkb:P00405	uniprotkb:P12787	uniprotkb:Q85K21|ensembl:ENSMUSP00000080994.1|intact:EBI-773506|uniprotkb:P00405	uniprotkb:Q9D2W1|ensembl:ENSMUSP00000000090.7|intact:EBI-2934751|uniprotkb:P12787	psi-mi:cox2_mouse(display_short)|psi-mi:Cytochrome c oxidase subunit 2(display_long)|uniprotkb:Cytochrome c oxidase polypeptide II(gene name synonym)|uniprotkb:COII(gene name synonym)|uniprotkb:mt-Co2(gene name synonym)|uniprotkb:COX2(gene name synonym)|uniprotkb:Mtco2(gene name)	psi-mi:cox5a_mouse(display_short)|psi-mi:Cytochrome c oxidase subunit 5A, mitochondrial(display_long)|uniprotkb:Cytochrome c oxidase polypeptide Va(gene name synonym)|uniprotkb:COX5A(gene name)	psi-mi:"MI:0276"(blue native page)	Strub GM. et al.(2011)	intact:EBI-25564513|pubmed:20959514|imex:IM-27921	taxid:10090(mouse)|taxid:10090(Mus musculus)	taxid:10090(mouse)|taxid:10090(Mus musculus)	psi-mi:"MI:0915"(physical association)	psi-mi:"MI:0486"(UniProt)	intact:EBI-25564884|imex:IM-27921-19	-	psi-mi:"MI:1060"(spoke expansion)	psi-mi:"MI:0499"(unspecified role)	psi-mi:"MI:0499"(unspecified role)	psi-mi:"MI:0497"(neutral component)	psi-mi:"MI:0497"(neutral component)	psi-mi:"MI:0326"(protein)	psi-mi:"MI:0326"(protein)	interpro:IPR001505|interpro:IPR002429|interpro:IPR008972|interpro:IPR011759|interpro:IPR014222|interpro:IPR034210|interpro:IPR036257|interpro:IPR045187|rcsb pdb:7O37|rcsb pdb:7O3C|rcsb pdb:7O3E|go:"GO:0004129"|go:"GO:0005507"|go:"GO:0005739"|go:"GO:0005743"|go:"GO:0005751"|go:"GO:0007595"|go:"GO:0009409"|go:"GO:0010729"|go:"GO:0010940"|go:"GO:0042773"|go:"GO:0045277"|go:"GO:2001171"|ensembl:ENSMU…	interpro:IPR003204|interpro:IPR036545|rcsb pdb:7O37|rcsb pdb:7O3C|rcsb pdb:7O3E|go:"GO:0004129"|go:"GO:0005739"|go:"GO:0005743"|go:"GO:0005751"|go:"GO:0006123"|go:"GO:0043209"|go:"GO:0046872"|ensembl:ENSMUSG00000000088.8(gene)|ensembl:ENSMUST00000000090.8(transcript)|mint:P12787|refseq:NP_031773.2|reactome:R-MMU-5628897|reactome:R-MMU-611105|reactome:R-MMU-9707564		-	-	figure legend:Supp. Table 2|full coverage:Only protein-protein interactions	taxid:10090(mouse-heart)|taxid:10090(Mus musculus heart [Cardiac; Cardiac tissue])	-	2020-04-15	2020-04-15	crc64:306C6EAD54802D11	crc64:8F6AFF91B5C6160F	-	-	-	-	0	0	psi-mi:"MI:0102"(sequence tag identification)	psi-mi:"MI:0102"(sequence tag identification)
uniprotkb:P62137	uniprotkb:P12787	uniprotkb:P08129|uniprotkb:P20653|uniprotkb:P22802|uniprotkb:Q3U7G7|uniprotkb:Q9Z1G2|ensembl:ENSMUSP00000039109.5|intact:EBI-357187|uniprotkb:P62137	uniprotkb:Q9D2W1|ensembl:ENSMUSP00000000090.7|intact:EBI-2934751|uniprotkb:P12787	psi-mi:pp1a_mouse(display_short)|psi-mi:Serine/threonine-protein phosphatase PP1-alpha catalytic subunit(display_long)|uniprotkb:PPP1CA(gene name)|uniprotkb:PPP1A(gene name synonym)	psi-mi:cox5a_mouse(display_short)|psi-mi:Cytochrome c oxidase subunit 5A, mitochondrial(display_long)|uniprotkb:Cytochrome c oxidase polypeptide Va(gene name synonym)|uniprotkb:COX5A(gene name)	psi-mi:"MI:0006"(anti bait coimmunoprecipitation)	Chiang DY. et al.(2015)	intact:EBI-16361580|pubmed:25593058|imex:IM-26193	taxid:10090(mouse)|taxid:10090(Mus musculus)	taxid:10090(mouse)|taxid:10090(Mus musculus)	psi-mi:"MI:0914"(association)	psi-mi:"MI:1332"(bhf-ucl)	intact:EBI-16369626|tissue list:TS-0444|imex:IM-26193-1	-	psi-mi:"MI:1060"(spoke expansion)	psi-mi:"MI:0499"(unspecified role)	psi-mi:"MI:0499"(unspecified role)	psi-mi:"MI:0496"(bait)	psi-mi:"MI:0498"(prey)	psi-mi:"MI:0326"(protein)	psi-mi:"MI:0326"(protein)	reactome:R-MMU-180024|refseq:NP_114074.1|mint:P62137|ensembl:ENSMUST00000046094.6(transcript)|ensembl:ENSMUSG00000040385.8(gene)|go:"GO:2001241"|go:"GO:0098978"|go:"GO:0098794"|go:"GO:0098793"|go:"GO:0098641"|go:"GO:0072357"|go:"GO:0051301"|go:"GO:0048754"|go:"GO:0046872"|go:"GO:0044877"|interpro:IPR004843|interpro:IPR006186|interpro:IPR029052|interpro:IPR031675|rcsb pdb:5ZT0|rcsb pdb:5ZQV|go:"GO…	interpro:IPR003204|interpro:IPR036545|rcsb pdb:7O37|rcsb pdb:7O3C|rcsb pdb:7O3E|go:"GO:0004129"|go:"GO:0005739"|go:"GO:0005743"|go:"GO:0005751"|go:"GO:0006123"|go:"GO:0043209"|go:"GO:0046872"|ensembl:ENSMUSG00000000088.8(gene)|ensembl:ENSMUST00000000090.8(transcript)|mint:P12787|refseq:NP_031773.2|reactome:R-MMU-5628897|reactome:R-MMU-611105|reactome:R-MMU-9707564		-	-	figure legend:Supplementary table 2|full coverage:Only protein-protein interactions	taxid:10090(mouse-heart-ventricle)|taxid:10090(Mouse heart ventricle)	-	2017-08-23	2019-04-15	crc64:8FBFD158A52282E0	crc64:8F6AFF91B5C6160F	-	-	-	-	0	0	psi-mi:"MI:0102"(sequence tag identification)	psi-mi:"MI:0102"(sequence tag identification)
